# Supplementary material for: Solid-contact Ca2+-selective electrodes based on two-dimensional black phosphorus as ion-to-electron transducers
Source: Royal Society of Chemistry journal article supplement (doi:10.1039/c7ra07743b), 2017-01-01
Supplement: c7ra07743b1.pdf [file c7ra07743b1.pdf]

## Supporting Information

1  
2  
3  
4  
5  
6  
7  
8  
9  
10  
11  
12  
13  
14  
15  
16  
17  
18  
19  
20  
21  
22  
23  
24  
25

### **Solid-contact Ca<sup>2+</sup>-selective electrodes based on two-dimensional black phosphorus as ion-to-electron transducer**

Lijuan Kou,<sup>\*ab</sup> Minglang Fu,<sup>a</sup> Rongning Liang<sup>\*b</sup>

<sup>a</sup>*School of Enology, Binzhou Medical University, Yantai, Shandong 264003, P. R. China.*

<sup>b</sup>*Key Laboratory of Coastal Environmental Processes and Ecological Remediation, Yantai Institute of Coastal Zone Research (YIC), Chinese Academy of Sciences (CAS), Shandong Provincial Key Laboratory of Coastal Zone Environmental Processes, YICCAS, Yantai, Shandong 264003, P. R. China.*

\*Corresponding author. Tel.: +86-535-6913727.

E-mail address: [koulijuan@bzmc.edu.cn](mailto:koulijuan@bzmc.edu.cn) (L. J. Kou); [rnliang@yic.ac.cn](mailto:rnliang@yic.ac.cn) (R. N. Liang)

1

## 2 ***Reagents and materials***

3 Black phosphorus powder (99.9%, pure) were purchased from Nanjing XFNANO Materials Tech  
4 Co.,Ltd (Nanjing, China). High molecular weight poly (vinyl chloride) (PVC), bis(2-ethylhexyl)  
5 sebacate (DOS), potassium chloride (KCl), calcium chloride (CaCl<sub>2</sub>) and sodium chloride (NaCl) were  
6 purchased from Sigma-Aldrich. Calcium ionophore IV N,N-Dicyclohexyl-N'N'-dioctadecyl-  
7 diglycolicdiamide (ETH 5234) and sodium tetrakis [3,5-bis(trifluoromethyl)phenyl]borate (NaTFPB)  
8 were Selectophore from Fluka AG (Buchs, Switzerland). Tetrahydrofuran (THF) was freshly distilled  
9 prior to use. All other reagents were obtained from Sinopharm Chemical Reagent Co., Ltd (Shanghai,  
10 China). All other reagents were analytical grade and used as received. Aqueous solutions were  
11 prepared by dissolving the appropriate salts in the freshly de-ionized water (18.2MΩ cm specific  
12 resistance) obtained with a Pall Cascada laboratory water system.

## 13 ***Preparation of solid-contact Ca<sup>2+</sup>-ISE***

14 Ca<sup>2+</sup>-selective membrane was prepared by dissolving 200 mg of components (in wt %) in 2.0 mL  
15 of THF: ionophore (ETH 5234), lipophilic cation-exchanger NaTFPB (0.5), PVC (33) and DOS  
16 (65.5). The membrane cocktail was degassed by sonication for 10 min before use. The glass carbon  
17 electrodes were carefully polished using alumina nanoparticles (500 nm), thoroughly rinsed with  
18 water and then bathed for 5 min in acetone. After that, they were completely air-dried. A mass  
19 of 10 mg of black phosphorus powder was dispersed in 5 mL anhydrous ethanol filled with  
20 nitrogen and away from light. Then the conducting polymer black phosphorus powder was  
21 deposited on glass carbon surface by drop-casting 10 μL of a 2 mg/mL ethanol solution for 5  
22 times and the solvent was left to evaporate at least 5 min in under nitrogen protection. The  
23 electrode was then introduced into a fitting PVC tube at a depth of 1 mm, allowing the casting of  
24 100 μL of membrane cocktail on the top of the black phosphorus layer, and left to dry at room  
25 temperature. Before use, the electrodes were conditioned in 10<sup>-3</sup> M CaCl<sub>2</sub> solution for one night.

## 26 ***Electromotive force (EMF) measurements***

27 All electromotive force measurements (EMF) were carried out at 25 °C using a CHI 760D  
28 electrochemical workstation (Shanghai, China) in the following galvanic cell: SCE/1 M

1 LiOAC/sample solution/ $\text{Ca}^{2+}$ -sensing membrane/ blackphosphorus/glass carbon. The EMF values  
2 were corrected for liquid junction potentials using the Henderson equation, and ion activities were  
3 calculated according to the Debye-Hückel approximation.

#### 4 *Capacitance measurements*

5 A three-electrode setup was used for measurements of the capacitance of black phosphorus. A  
6 solid-contact  $\text{Ca}^{2+}$ -ISE with or without a black phosphorus film was used as the working  
7 electrode, a Pt wire as the counter electrode, and an Ag/AgCl (3 M KCl) electrode as the reference  
8 electrode. Electrochemical impedance spectroscopy (EIS) experiments were carried out a  $10^{-3}$  M  
9  $\text{CaCl}_2$  solution on a CHI 760D electrochemical workstation. The frequency range was 0.3 Hz to  
10 10 kHz, with an excitation amplitude of 10 mV versus the open circuit potential.

#### 11 *Chronopotentiometric measurements*

12 Chronopotentiometric measurements were performed in  $10^{-3}$  M  $\text{CaCl}_2$  by applying a constant  
13 current of +1 nA for 60 s and followed by a reverse current of the same magnitude for another 60  
14 s. The capacitance of the electrode was calculated by using the constant current divided by the  
15 slope of the discharge curve in a potential versus time graph.

16

1 **Table S1.** Comparison of analytical characteristics of the solid-contact ISEs with the present GC/black  
 2 phosphorus/Ca<sup>2+</sup>-ISE

| Electrode                                 | Potential drift ( $\mu\text{V/s}$ ) | LOD (mol/L)          | Reproducibility (%) | Reference |
|-------------------------------------------|-------------------------------------|----------------------|---------------------|-----------|
| GC/GO-PANI/ Ca <sup>2+</sup> -ISE         | 87                                  | $5 \times 10^{-8}$   | 1.1%                | 1         |
| GC/carbon nanotube/ Ca <sup>2+</sup> -ISE | 930                                 | $6.3 \times 10^{-7}$ | Not shown           | 2         |
| GC/MoS <sub>2</sub> / K <sup>+</sup> -ISE | 10                                  | $3.2 \times 10^{-6}$ | Not shown           | 3         |
| GC/black phosphorus/Ca <sup>2+</sup> -ISE | 72                                  | $4.6 \times 10^{-7}$ | 3.8%                | Present   |

3

4

5

6

7 **Table S2.** Potentiometric selectivity coefficients ( $\log K_{IJ}$ ) detected for solid-contact Ca<sup>2+</sup>-ISE

| Ion              | Liquid contact <sup>4,5</sup> | Solid contact Ca <sup>2+</sup> -ISE <sup>a</sup> |
|------------------|-------------------------------|--------------------------------------------------|
| H <sup>+</sup>   | -3.6                          | $-3.5 \pm 0.1$                                   |
| Na <sup>+</sup>  | -5.8                          | $-6.1 \pm 0.2$                                   |
| K <sup>+</sup>   | -6.5                          | $-6.7 \pm 0.1$                                   |
| Mg <sup>2+</sup> | -9.5                          | $-9.5 \pm 0.2$                                   |

8 <sup>a</sup> Standard deviations of 3 measurements given.

9

10

11

1 **Table S3.** Application of solid-contact Ca<sup>2+</sup>-ISE to determination of Ca<sup>2+</sup> in wine samples

| Sample       | Proposed sensor<br>(10 <sup>-3</sup> M) <sup>a</sup> | AAS<br>(10 <sup>-3</sup> M) <sup>a</sup> | Recovery results              |                                            |                 |
|--------------|------------------------------------------------------|------------------------------------------|-------------------------------|--------------------------------------------|-----------------|
|              |                                                      |                                          | Added<br>(10 <sup>-3</sup> M) | Found<br>(10 <sup>-3</sup> M) <sup>a</sup> | Recovery<br>(%) |
| Wine sample1 | 2.0 ± 0.1                                            | 2.2 ± 0.1                                | 0.40                          | 2.5 ± 0.4                                  | 125             |
|              |                                                      |                                          | 1.0                           | 2.9 ± 0.3                                  | 90              |
| Wine sample2 | 2.6 ± 0.2                                            | 2.5 ± 0.1                                | 0.40                          | 3.0 ± 0.1                                  | 100             |
|              |                                                      |                                          | 1.0                           | 3.7 ± 0.2                                  | 110             |

2  
3 <sup>a</sup> Average of three measurements ± standard deviation.  
4

1 **References for the Supporting Information:**

- 2 1. Z. A. Boeva and T. Lindfors, *Sensors and Actuators B-Chemical*, 2016, **224**, 624-631.
- 3 2. R. Hernández, J. Riu and F. X. Rius, *Analyst*, 2010, **135**, 1979-1985.
- 4 3. X. Z. Zeng, S. Y. Yu, Q. Yuan and W. Qin, *Sensors and Actuators B-Chemical*, 2016, **234**, 80-83.
- 5 4. T. Vigassy, R. E. Gyurcsanyi and E. Pretsch, *Electroanalysis*, 2003, **15**, 1270-1275.
- 6 5. J. Sutter and E. Pretsch, *Electroanalysis*, 2006, **18**, 19-25.

7
